# Supplementary material for: The Toll–Like Receptor 2/6 Agonist, FSL–1 Lipopeptide, Therapeutically Mitigates Acute Radiation Syndrome
Source: PubMed Central journal article supplement (PMC5725477; doi:10.1038/s41598-017-17729-9), 2017-12-11
Supplement: 41598_2017_17729_MOESM1_ESM.pdf [file 41598_2017_17729_MOESM1_ESM.pdf]

## **Supplementary Information**

### **The Toll-Like Receptor 2/6 Agonist, FSL-1 Lipopeptide, Therapeutically Mitigates Acute Radiation Syndrome**

Cathryn J. Kurkjian, Hao Guo, Nathan D. Montgomery, Ning Cheng, Hong Yuan,  
Joseph R. Merrill, Gregory D. Sempowski, W. June Brickey, and Jenny P.-Y. Ting

## Supplementary Methods

**Magnetic resonance imaging.** MR imaging study was conducted on a 9.4T animal MRI scanner (BioSpec 94/30 model, Bruker BioSpin Inc) in the Small Animal Imaging Facility. Anatomical T2-weighted MR images on brains were acquired using the Rapid Acquisition with Relaxation Enhancement (RARE) sequence with the following acquisition parameters: Echo time (TE) of 30ms and Repetition time (TR) of 3323 ms, 0.5 mm slice thickness, 200x200 matrix size, and 100x100 micron in-plane resolution. For MRI on abdominal regions, gated T2-weighted MRI was acquired using the RARE sequence and the following parameters: TE/TR of 21/4000 ms, 1 mm slice thickness, 192x256 matrix size, and 130x117 micron in-plane resolution. Mice were maintained under anesthesia using isoflurane (1.5%) mixed with oxygen during MR scanning and recovered from anesthesia after imaging.

**Supplementary Table S1. Clinical Score Parameters.**

| Category                      | Score | Description                                           |
|-------------------------------|-------|-------------------------------------------------------|
| Body weight <sup>a</sup>      | 0     | normal (<5% change from initial weight)               |
|                               | 1     | 5-10% weight change                                   |
|                               | 2     | 10-14.9% weight change                                |
|                               | 3     | 15-19.9% weight change                                |
|                               | 4     | 20-24.9% weight change                                |
|                               | 6     | ≥25% weight change                                    |
| Body temperature <sup>b</sup> | 0     | normal (33-35°C)                                      |
|                               | 2     | 30-32.9°C                                             |
|                               | 4     | 28-29.9°C                                             |
|                               | 6     | <28°C                                                 |
| Hydration                     | 0     | normal                                                |
|                               | 1     | mildly dehydrated (<1sec skin tent)                   |
|                               | 2     | moderately dehydrated (1-2sec skin tent) <sup>c</sup> |
|                               | 4     | severely dehydrated (>2sec skin tent) <sup>c</sup>    |
| Appearance                    | 0     | normal                                                |
|                               | 1     | lack of grooming                                      |
|                               | 2     | rough hair/coat                                       |
|                               | 3     | very rough hair/coat                                  |
| Posture                       | 0     | normal                                                |
|                               | 1     | sitting in hunched position                           |
|                               | 4     | hunched posture, head resting on floor                |
|                               | 6     | lying prone on cage floor                             |
| Activity                      | 0     | normal                                                |
|                               | 1     | reduced/minor changes in behavior                     |
|                               | 3     | changes in activity and respiratory rate or effort    |
|                               | 6     | moves only when stimulated                            |
| Appetite                      | 0     | normal                                                |
|                               | 1     | reduced                                               |
|                               | 2     | not eating since last daily check point               |
|                               | 3     | not eating for last 2 daily check points              |

<sup>a</sup>, assessed weekly, then every other day when 10% weight change reached, and daily after 15% weight change reached.

<sup>b</sup>, ventral surface temperature determined using infrared thermometer.

<sup>c</sup>, with supplemental fluids given s.c. and hydration such as hydrogel provided.

Endpoint for euthanasia: any single parameter score of 6 or combined score of 15.

**Supplementary Table S2. Serum factors induced after TBI with or without FSL-1 treatment.**

| Serum factor<br>(pg/ml<br>threshold<br>detection) | Treatment  | Amount (pg/ml $\pm$ s.e.m.) |                 |                  |                  |
|---------------------------------------------------|------------|-----------------------------|-----------------|------------------|------------------|
|                                                   |            | Day 3                       | Day 9           | Day 17           | Day 31           |
| M-CSF<br>(1.5)                                    | NT         | ND                          | ND              | ND               | 2.7 $\pm$ 1.2    |
|                                                   | FSL-1      | 1.5                         | 1.5             | 2.4 $\pm$ 0.9    | 1.5              |
|                                                   | TBI, NT    | 4.3 $\pm$ 1.0               | 2.2 $\pm$ 0.7   | 6.2 $\pm$ 2.0    | ND               |
|                                                   | TBI, FSL-1 | 5.0 $\pm$ 2.7               | 12.9 $\pm$ 10.6 | 1.5              | 1.5              |
| IL-5<br>(1.6)                                     | NT         | ND                          | ND              | ND               | 6.2 $\pm$ 3.2    |
|                                                   | FSL-1      | 1.6                         | 1.6             | 4.7 $\pm$ 2.5    | 4.9 $\pm$ 3.3    |
|                                                   | TBI, NT    | 267.2 $\pm$ 237             | 75.1 $\pm$ 17.2 | 26.9 $\pm$ 7.9   | ND               |
|                                                   | TBI, FSL-1 | 23.0 $\pm$ 3.4              | 57.1 $\pm$ 7.6  | 24.3 $\pm$ 4.9   | 27.1 $\pm$ 14.7  |
| IL-6<br>(1.6)                                     | NT         | ND                          | ND              | ND               | 1.6              |
|                                                   | FSL-1      | 3.9 $\pm$ 2.3               | 1.6             | 1.6              | 1.6              |
|                                                   | TBI, NT    | 294 $\pm$ 291.1             | 6.4 $\pm$ 2.0   | 202.2 $\pm$ 193  | ND               |
|                                                   | TBI, FSL-1 | 3.8 $\pm$ 0.9               | 4.4 $\pm$ 1.8   | 7.2 $\pm$ 1.8    | 2.1 $\pm$ 0.5    |
| IL-9<br>(44.1)                                    | NT         | ND                          | ND              | ND               | 44.1             |
|                                                   | FSL-1      | 139.4 $\pm$ 52              | 125 $\pm$ 59.6  | 229.5 $\pm$ 185  | 83.8 $\pm$ 39.7  |
|                                                   | TBI, NT    | 368 $\pm$ 196.9             | 59.9 $\pm$ 15.8 | 58.8 $\pm$ 14.7  | ND               |
|                                                   | TBI, FSL-1 | 2176 $\pm$ 1957             | 205 $\pm$ 66.7  | 44.1             | 44.1             |
| IL-13<br>(1.4)                                    | NT         | ND                          | ND              | ND               | 11 $\pm$ 4       |
|                                                   | FSL-1      | 19.9 $\pm$ 1.2              | 10.6 $\pm$ 3.6  | 20.3 $\pm$ 2.6   | 13 $\pm$ 3       |
|                                                   | TBI, NT    | 933 $\pm$ 919               | 7 $\pm$ 0       | 17.1 $\pm$ 5.6   | ND               |
|                                                   | TBI, FSL-1 | 19.8 $\pm$ 8.9              | 11.0 $\pm$ 2.5  | 7 $\pm$ 0        | 11.4 $\pm$ 2.8   |
| Cxcl1/KC<br>(1.6)                                 | NT         | ND                          | ND              | ND               | 108 $\pm$ 24.7   |
|                                                   | FSL-1      | 246.5 $\pm$ 5               | 61.6 $\pm$ 16.3 | 90.6 $\pm$ 6.0   | 68 $\pm$ 20.8    |
|                                                   | TBI        | 341 $\pm$ 170.4             | 150 $\pm$ 24.8  | 1231 $\pm$ 1148  | ND               |
|                                                   | TBI, FSL-1 | 351.1 $\pm$ 22              | 171 $\pm$ 37.9  | 124.8 $\pm$ 9.2  | 163.5 $\pm$ 57.8 |
| Cxcl2/MIP-2<br>(6.6)                              | NT         | ND                          | ND              | ND               | 75.1 $\pm$ 12.2  |
|                                                   | FSL-1      | 76.7 $\pm$ 2.4              | 47.6 $\pm$ 9.1  | 58.7 $\pm$ 19.8  | 38.1 $\pm$ 12.8  |
|                                                   | TBI, NT    | 262 $\pm$ 170.4             | 41.8 $\pm$ 9.6  | 338 $\pm$ 262.2  | ND               |
|                                                   | TBI, FSL-1 | 101.3 $\pm$ 11              | 78.9 $\pm$ 42.7 | 35.8 $\pm$ 10.6  | 35.3 $\pm$ 12.0  |
| Cxcl5/LIX<br>(180.4)                              | NT         | ND                          | ND              | ND               | 9353 $\pm$ 518   |
|                                                   | FSL-1      | 4501 $\pm$ 581              | 4251 $\pm$ 839* | 6494 $\pm$ 2206† | 6077 $\pm$ 1640† |
|                                                   | TBI, NT    | 3225 $\pm$ 1151             | 180.4           | 180.4            | ND               |
|                                                   | TBI, FSL-1 | 4352 $\pm$ 1166             | 180.4           | 180.4            | 784.7 $\pm$ 232  |
| Cxcl9/MIG<br>(9.0)                                | NT         | ND                          | ND              | ND               | 67.7 $\pm$ 27.6  |
|                                                   | FSL-1      | 89.9 $\pm$ 7.8              | 118 $\pm$ 10.8  | 110.1 $\pm$ 3.3  | 52.6 $\pm$ 3.3   |
|                                                   | TBI, NT    | 215.3 $\pm$ 126             | 83.4 $\pm$ 9.4  | 44.5 $\pm$ 5.5   | ND               |
|                                                   | TBI, FSL-1 | 71.5 $\pm$ 7.5              | 112.8 $\pm$ 57  | 79.1 $\pm$ 12.4  | 166.4 $\pm$ 32.6 |

|                              |            |             |             |              |              |
|------------------------------|------------|-------------|-------------|--------------|--------------|
| Cxcl10/IP-10<br>(1.6)        | NT         | ND          | ND          | ND           | 146.2 ± 27.2 |
|                              | FSL-1      | 245 ± 11    | 200.6 ± 22  | 182.4 ± 37.7 | 171.8 ± 38.6 |
|                              | TBI, NT    | 495.7 ± 275 | 156 ± 24.5  | 194.1 ± 64.5 | ND           |
|                              | TBI, FSL-1 | 202.4 ± 28  | 89.7 ± 31.6 | 119.6 ± 14.7 | 262.5 ± 35.4 |
| Ccl2/MCP-1<br>(1.8)          | NT         | ND          | ND          | ND           | 8.3 ± 6.5    |
|                              | FSL-1      | 33.6 ± 8.4  | 12.2 ± 7.1‡ | 17.6 ± 1.8   | 8.3 ± 6.5    |
|                              | TBI, NT    | 294.3 ± 291 | 6.4 ± 2.0   | 202.2 ± 193  | ND           |
|                              | TBI, FSL-1 | 170.3 ± 41  | 39.9 ± 3.3  | 46.8 ± 7.4   | 24.4 ± 6.6   |
| Ccl3/MIP-1 $\alpha$<br>(8.6) | NT         | ND          | ND          | ND           | 22.3 ± 7.3   |
|                              | FSL-1      | 12.8 ± 4.2  | 9.6 ± 1.0   | 23.4 ± 14.8  | 8.6          |
|                              | TBI, NT    | 26.4 ± 3.8  | 10.3 ± 1.7  | 29.4 ± 20.8  | ND           |
|                              | TBI, FSL-1 | 64.4 ± 34.3 | 14.6 ± 2.6  | 8.6          | 10.3 ± 1.7   |
| Ccl4/MIP-1 $\beta$<br>(8.2)  | NT         | ND          | ND          | ND           | 12.8 ± 4.6   |
|                              | FSL-1      | 14.0 ± 2.9  | 11.8 ± 3.6  | 15.5 ± 3.9   | 9.0 ± 0.8    |
|                              | TBI, NT    | 136.4 ± 115 | 12.0 ± 2.4  | 26.1 ± 14.5  | ND           |
|                              | TBI, FSL-1 | 34.7 ± 13.3 | 17.1 ± 4.2  | 18.4 ± 2.8   | 26.2 ± 4.6   |

Factors were measured by multiplex analyte assay MCYTOMAG-70K (EMD Millipore, Germany).

NT, no treatment; \* $p < 0.001$ , † $p < 0.01$  and ‡ $p < 0.05$  for FSL-1 vs TBI, FSL-1.

ND, none detected.

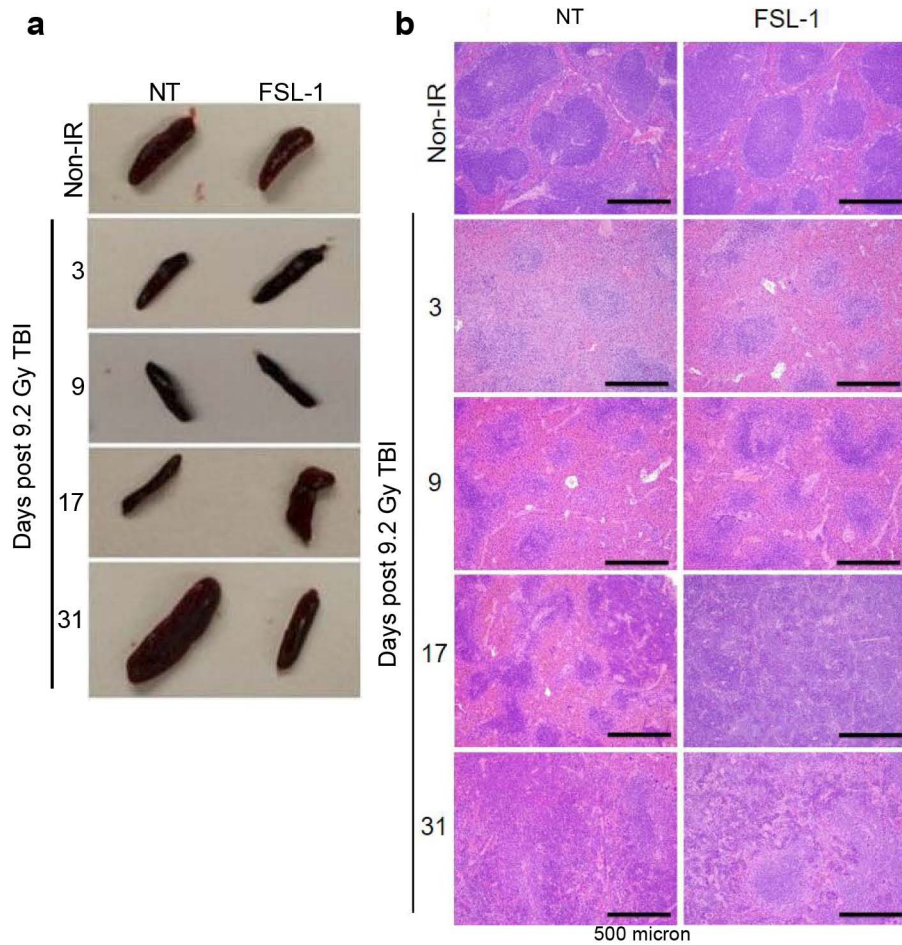

**Suppl. Fig. S1. Splenic histology of FSL-1-treated mice.** C57BL/6 mice were administered physiological water (NT) or FSL-1 at 24 hours post 9.2 Gy TBI (n=6-15 per group). Spleens were harvested at 3, 9, 17 and 31 days post TBI. (a) Representative pictures of spleens were taken at each time point. (b) Representative images of H&E stained spleen sections are shown.

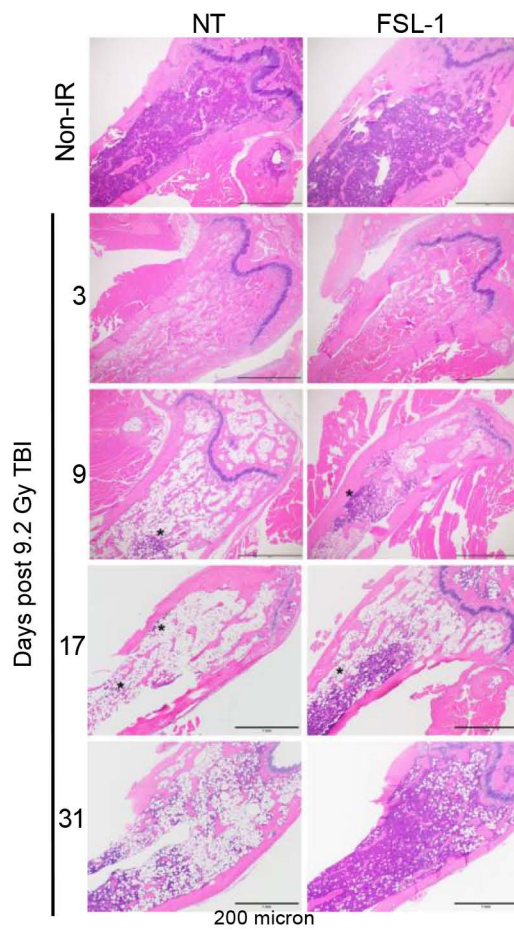

**Suppl. Fig. S2. Femur histology of FSL-1-treated mice.** Representative images of H&E stained femur sections are shown. \* indicates areas of hematopoiesis.

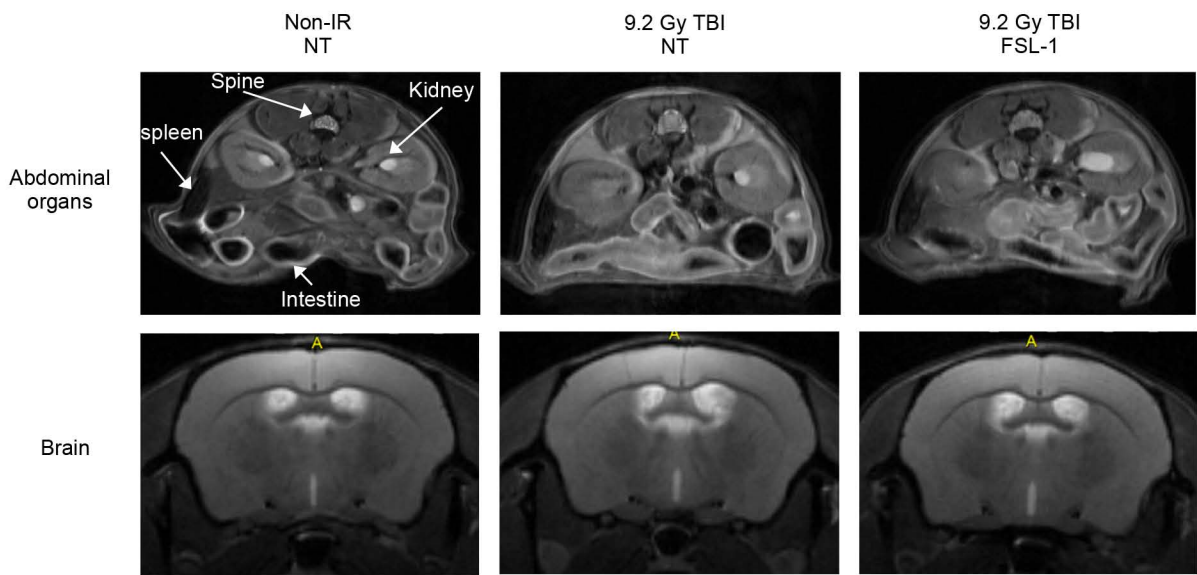

**Suppl. Fig. S3. No physiologic changes evident in FSL-1-treated long-living survivors.** Male C57BL/6 mice were administered physiological water (NT; 6/20 survived) or FSL-1 (19/20 survived) at 24 hours post 9.2 Gy TBI. Surviving mice were monitored for over 600 days and T2-weighted Magnetic Resonance Imaging (MRI) were conducted to three FSL-1 treated survivors and three age-matched control mice. A, axial view. Representative images of abdominal organs and brains are shown.
